1 **Optical flow analysis reveals that Kinesin-mediated advection impacts on the orientation of**  
2 **microtubules**

3  
4 Maik Drechsler<sup>1,2,6,#</sup>, Lukas F. Lang<sup>3,#</sup>, Hendrik Dirks<sup>4</sup>, Martin Burger<sup>5</sup>, Carola-Bibiane Schönlieb<sup>3</sup> and  
5 Isabel M. Palacios<sup>1,6</sup>

6  
7 <sup>1</sup>*School of Biological and Chemical Sciences, Queen Mary University of London, Mile End Road, London E1 4NS, UK and*  
8 *Department of Zoology, University of Cambridge, Cambridge CB2 3EJ, UK*

9 <sup>2</sup>*Department of Zoology and Developmental Biology, University of Osnabrück, BarbarasträÙe 11, 49076 Osnabrück,*  
10 *Germany*

11 <sup>3</sup>*Department of Applied Mathematics and Theoretical Physics, University of Cambridge, Wilberforce Road, Cambridge*  
12 *CB3 0WA, UK*

13 <sup>4</sup>*Institute for Computational and Applied Mathematics, University of Münster, Einsteinstraße 62, 48149 Münster, Germany*

14 <sup>5</sup>*Department of Mathematics, Friedrich-Alexander Universität Erlangen-Nürnberg, Cauerstraße 11, 91058 Erlangen,*  
15 *Germany*

16 <sup>6</sup>*Corresponding authors: [drechsler@biologie.uni-osnabrueck.de](mailto:drechsler@biologie.uni-osnabrueck.de), [i.palacios@qmul.ac.uk](mailto:i.palacios@qmul.ac.uk) tel. +44 (0)20 7882 6909*

17 *#equal contribution*

18

19 *Key words: self-organisation; active processes; optical flow; advection; asymmetries; polarity;*  
20 *cytoskeleton; microtubules; actin; motor proteins; body plan; oogenesis*

21 **ABSTRACT**

22 The polar orientation of microtubule networks is exploited by molecular motors, such as kinesins, to  
23 deliver cargoes to specific intracellular destinations, and is thus essential for cell polarity and cell  
24 function. Reconstituted *in vitro* systems have largely contributed to the current understanding of the  
25 molecular framework, regulating the behaviour of single microtubule filaments. In cells however,  
26 microtubules are subjected to a variety of different biomechanical forces that might impact on their  
27 orientation and thus on the organisation of the entire network. Here we implement variational optical  
28 flow analysis as a new approach to analyse the polarity of microtubule networks *in vivo*, and find that  
29 cytoplasmic flows impact on the growth direction of microtubule plus ends in the *Drosophila* oocyte.  
30 We provide a thorough characterisation of microtubule behaviour and orientation under different  
31 kinesin-dependent cytoplasmic flow conditions, and establish that flows are sufficient and necessary  
32 to support the overall organisation of the microtubule cytoskeleton.

### 33 **Introduction**

34 Eukaryotic life depends on many dynamic processes, including for example cell division, cell  
35 migration, and cell polarisation. These processes in turn strongly rely on highly organised  
36 microtubule (MT) arrays. All MT networks are polarised, with the minus end of each filament linked  
37 to a nucleating centre (MT organising centre or MTOC), and the plus end growing away from these  
38 centres. This intrinsic polarity is utilised by specific motor proteins to transport cargo along MTs in a  
39 defined direction, and is essential for the function of MT networks, and consequently for the function  
40 and polarity of cells.

41 A number of biophysical studies in reconstituted *in vitro* systems have helped to understand the  
42 mechanical properties of MTs, setting the stage to investigate the behaviour of MTs *in vivo*. However,  
43 much needs to be learnt about the properties of MTs in their natural intracellular environment. For  
44 example, a rather new concept emanating from *in vivo* experiments is that controlling nucleation and  
45 the position of minus ends alone is not always sufficient to establish the proper polarity of the  
46 network. Thus MT plus ends must be controlled as well in order to allow motor proteins to deliver  
47 their cargoes to the correct destination. The plus ends can be regulated at various levels, including  
48 dynamic instability, capturing, and direction of growth. Dynamic instability describes a process, in  
49 which MT polymerisation is interrupted by a rapid depolymerisation phase, followed by a 'rescue'  
50 process<sup>1</sup>. Various MT-associated proteins, such as molecular motors and MT plus end-tracking  
51 proteins (+TIPs), are known to regulate dynamic instability<sup>2</sup>. Furthermore, MT plus ends can also be  
52 stabilised by cortical capture, also involving +TIPs and other molecules such as the Dynein/Dynactin  
53 complex<sup>3</sup> (and as reviewed in<sup>2</sup>). However, very little is known about how the direction of growth of  
54 plus ends, and therefore the orientation of MTs, is controlled in cells. In axons, adenomatous  
55 polyposis coli (APC) regulates MT looping, probably by controlling plus end direction<sup>4</sup>, while Fidgetin-  
56 like1, a MT-associated ATPase, controls both dynamics and plus ends direction<sup>5</sup>. MT bending also  
57 impacts on the direction of plus tip growth, as the MT tip has been seen to rotate due to local bend  
58 formation<sup>6</sup>. Furthermore, +TIPs that contain actin-binding domains can influence MT growth direction  
59 by guiding dynamic plus ends along actin bundles<sup>7,8</sup>.

60 A striking example of MT-dependent cell polarisation takes place in the oocyte of *Drosophila*  
61 *melanogaster*, where the MT cytoskeleton directs the asymmetric localisation of body plan  
62 determinants. For example, the plus end motor Kinesin-1 (Kin from here on) is essential for the  
63 localisation of *oskar* mRNA to the posterior pole of the mid-oogenesis stage 9 (st9) oocyte, an  
64 essential step in the establishment of the anterior-posterior (A-P) axis and the formation of the germ  
65 cells of the embryo. The st9 oocyte is roughly hemispherical, extending approximately 80-100µm  
66 along the A-P axis. MTs are nucleated from the antero-lateral cortex in a gradient of diminishing  
67 abundance toward the posterior pole, where nucleation is absent, while the growing plus ends exhibit  
68 a weak global posterior orientation bias<sup>9-11</sup>. In the oocyte, Kin is also responsible for inducing the  
69 advective motion of cytoplasmic content, called cytoplasmic streaming (or cytoplasmic flows)<sup>12</sup>,

70 which mixes the cytoplasm of the large oocyte<sup>13</sup>, and aids the localisation of developmental  
71 determinants and mitochondria<sup>14-16</sup>.

72 So far it is debatable how flows are actually induced, whether by viscous drag of translocating Kin  
73 molecules<sup>17</sup>, sliding of microtubules<sup>18</sup>, or both. However, it has been shown that they have an impact  
74 on the organisation of the cytoplasm. Recently we found that Kin-mediated cytoplasmic flows  
75 constitute a key force driving the ballistic, persistent motion of cytoplasmic vesicles as well as actin  
76 filaments in st9 oocytes<sup>19</sup>. These observations prompted us to study the *in vivo* behaviour of MTs  
77 under different flow conditions, and to address the question of how advection impacts on the  
78 organisation of the MT network in the oocyte.

79 In order to assess the global MT orientation, and to investigate the growth direction of MT plus ends,  
80 we used EB1::GFP (EB1 from here on) to follow MT growth *in vivo*. EB1 exclusively decorates the  
81 growing plus end of MTs, resulting in dynamic ‘comets’ moving through the cytoplasm<sup>20</sup>. Analysing  
82 the dynamic behaviour of MTs and their orientation in complex MT networks has proven technically  
83 challenging, and requires suitable imaging and image analysis tools. Especially for the *Drosophila*  
84 oocyte, we found the published methods too demanding on the imaging level, requiring state of the  
85 art wide-field deconvolution microscopy and rather elaborate image processing<sup>9</sup>. Consequently, we  
86 found it to be an unfeasible approach for the various experimental conditions that our study required.  
87 Therefore, we developed a new image analysis pipeline that allows an efficient and reliable  
88 characterisation of direction and distribution of the growth of EB1-labelled ‘comets’ *in vivo*.

89 In the present study, we demonstrate a strategy to assess the architecture of the dense MT network  
90 found in *Drosophila* oocytes from confocal image series by an optical flow-based motion estimation  
91 (OF) approach. In general OF allows to estimate the apparent motion of intensities, like fluorescence  
92 signals, from a sequence of images<sup>21</sup>. Variational OF methods, furthermore constitute a well-  
93 established and powerful framework for reliable dense motion estimation, omitting elaborate  
94 segmentation or tracking of the studied structures. Importantly, OF methods have been shown to  
95 outperform popular methods, such as particle image velocimetry (PIV), for motion analysis, resulting  
96 in higher accuracy and efficiency in certain settings and, in particular, in the presence of noise<sup>22,23</sup>.  
97 While variational OF methods have been used predominantly to investigate the dynamics of entire  
98 cells<sup>24-31</sup>, recent works focused on their application to study intracellular motility as well<sup>22,32-35</sup>. The  
99 high noise level, poor contrast, and the relatively small size of the EB1 comets, constituted the main  
100 challenges in the analysis of our data. Consequently, classical methods (such as particle tracking or  
101 PIV) either failed or struggled to extract reliable results from confocal EB1 images.

102 Here, we demonstrate a two-step image analysis approach that is based on variational OF and is  
103 able to estimate approximate velocities (speed and direction) of EB1 comets in confocal image  
104 sequences in a reliable and efficient manner. This allowed us for the first time to investigate the  
105 organisation of the MT cytoskeleton along the entire A-P axis of the *Drosophila* oocyte, and revealed  
106 that cytoplasmic flows are sufficient and necessary to regulate the polarity of this MT network.

## 107 **RESULTS**

### 108 **Cytoplasmic flows are sufficient to alter the bulk movement, bundling and length of MTs**

109 In st9 oocytes, the velocities of cytoplasmic flows directly correlate with Kin activity, while the pattern  
110 and topology of these flows are tightly linked to the architecture of the underlying MT network<sup>13</sup>. We  
111 recently found that cytoplasmic flows are a major force, driving the persistent motion - and supporting  
112 the active diffusion - of cytoplasmic vesicles and actin filaments<sup>19</sup>. These findings prompted us to  
113 investigate the impact of flows and advection on the behaviour of MTs. We first imaged the MT-  
114 associated protein Jupiter::GFP (Jup from here on)<sup>36</sup> in st9 oocytes by confocal microscopy and  
115 monitored the dynamic behaviour of MTs over time (Figure 1a). The acquired time-lapse sequences  
116 showed that MTs undergo a significant bulk movement and ‘flow’ through the oocyte (Supplementary  
117 Movie 1). Kymographs along the lateral axis of the cell also revealed that MTs are subjected to  
118 dynamic bending, and thereby change their spatial orientation over time (Figure 1a’).

119 Previously, it has been shown that artificial fast fluid flows affect the dynamic behaviour of MTs in  
120 the oocyte<sup>37</sup>. To investigate how changing the regime of flows affects MT behaviour in more detail,  
121 we monitored Jup-labelled MTs in oocytes lacking the formin Cappuccino (Capu). Capu constitutes  
122 an actin nucleator, necessary for the formation of a cytoplasmic actin mesh. This specialised actin  
123 network traverses the oocyte and counteracts Kin-induced cytoplasmic flows. Thus, oocytes without  
124 Capu lack the actin mesh and display faster streaming<sup>38,39</sup>. Consistently, we observed that MTs in  
125 *capu* mutant oocytes appear as thick bundles, that dramatically bend and buckle. These bundles are  
126 likely a result of an increase in MT density by ‘clustering’ in certain areas of the cell (Figure 1c,c’,  
127 Supplementary Movie 1). However, while previously described as subcortical arrays<sup>37</sup>, our data  
128 demonstrates that in *capu* mutants MTs bundle, even when they are not in immediate proximity to  
129 the cell cortex. Finally, the observed MT bundles appear longer compared to control cells, and  
130 frequently extend far into the posterior regions of the oocyte (red arrow in Figure 1c). Our results  
131 suggest that changing the regime of cytoplasmic flows impacts on the bulk movement, the bundling  
132 state, and the length of MTs in the oocyte.

### 134 **Quantification of MT plus-tip directionality by optical flow analysis**

135 In addition to exhibiting fast cytoplasmic flows, *capu* mutant oocytes also fail to localise posterior  
136 cargo such as *oskar* mRNA or the *oskar* mRNA-binding protein Staufen (Figure 1d)<sup>38</sup>. Since  
137 cytoplasmic flows obviously affect the bulk movement of MTs, we therefore wondered whether they  
138 are also sufficient to alter the spatial orientation of single MT filaments within a cell, which might  
139 contribute to the observed cargo localisation defects. In other words, are cytoplasmic flows  
140 necessary to maintain the correct polarity of the MT network in wild-type oocytes? To address this  
141 question, we used oocytes expressing EB1 (Figure 2a,d and Supplementary Methods). EB1  
142 constitutes a versatile marker for growing plus-tips and has been used in fly oocytes before<sup>3,9</sup>. In  
143 these previous studies, widefield deconvolution microscopy was used to image EB1 dynamics in  
144 specific areas of the oocyte. However, widefield microscopy has a limited focus depth and works

145 best on thin samples. Thus widefield microscopy only allows to image EB1 dynamics close to the  
146 cortex in *Drosophila* oocytes. We implemented a strategy that combines conventional confocal  
147 microscopy, which is widely available and allows to image deeper into the oocyte, with image  
148 analysis by variational OF.

149 OF-based motion estimation relies on the assumption that particles approximately maintain their  
150 pixel intensity as they move. As this is formulated on a per-pixel basis, this method allows to infer a  
151 displacement vector for each pixel and does not require sophisticated tracking of individual particles  
152 (Figure 2b). Since EB1 dynamics demand imaging at a reasonably high frame rate, the confocal raw  
153 data exhibits a considerable high noise contamination (Figure 2d). Due to this high noise level,  
154 preceding denoising of the image data was required before applying the motion estimation. We found  
155 that total variation-based<sup>40</sup> image denoising with additional temporal regularisation was sufficient to  
156 obtain a significant improvement of the signal-to-noise ratio and of the visibility of EB1 comets (Figure  
157 2d,e, Supplementary Methods, Supplementary Figures 1-3 and Supplementary Movie 2).

158 The improved image sequences were then used as input to the second step, in which displacement  
159 vector fields were computed with a variational OF method (Supplementary Figure 4). After  
160 accounting for the pixel size and the time interval between consecutive frames, these displacements  
161 can be regarded as approximate velocities of fluorescence signals and of thus EB1 comets (see  
162 Figure 2f-h). A typical image sequence with 100 frames and a pixel resolution of 512 x 256 pixels  
163 results in a total number of approximately 13 million computed velocity vectors that require  
164 appropriate interpretation. The computation time for processing one typical sequence amounted to  
165 less than 25 minutes on average.

166 We visualised the estimated velocity fields with the help of a standard colour-coding<sup>41</sup>. The velocity  
167 vector at each pixel and at a certain frame is represented by a colour that is determined by the  
168 direction of the signal's movement (see the colour-coding at the boundary of the images in Figure  
169 2f-h). The plotted colour's intensity is determined by the relative speed of the movement. For our  
170 statistical analyses, we considered only velocities of pixels located within a hand-drawn  
171 segmentation mask that outlines the oocyte in each sequence (Figures 2h). These velocities can  
172 then be represented in polar coordinates, resulting in angles and speeds. For each image sequence,  
173 we visualised the distribution of angles in a rose diagram (or angular histogram) in different colours  
174 (Figure 2j), and the distribution of angles of multiple sequences in an aggregated way (Figure 2k).  
175 First, we used OF to describe MT orientation in control oocytes (Figure 2i-m, Supplementary Figure  
176 5). Since all cells were orientated in the same way during imaging, the angles given in the rose  
177 diagram reflect the growth direction of EB1 comets within a cell (with 0° corresponding to posterior  
178 and 180° corresponding to anterior). For a quantitative description of MT orientation, we determined  
179 the mean angular direction of EB1 signals ( $\theta_{avg}$ , considering all recorded cells, Figure 2l, Table 1)  
180 and the frequency of signals directed towards the anterior (90° to 270°) or the posterior (270° to 90°)  
181 (Figure 2l). As a descriptor of how focused MTs grow towards the posterior tip of the cell, we also

182 determined the relative frequency of posterior growing EB1 signals (270° to 90°) that fall within an  
183 arbitrarily defined circular sector of 60° (from 330° to 30°, called 'posterior tip', Figure 2c). For control  
184 cells, we found that all growing MTs exhibit a global posterior orientation bias, with 66% of all comets  
185 growing towards the posterior of the cell (Figure 2l), and 40% of those exhibiting a posterior tip  
186 orientation (Figure 2m). These findings are in good agreement with previous reports of directional  
187 MT bias in the oocyte<sup>9</sup>.

188 In order to validate our two-step variational OF-based approach, we analysed EB1 comets in  
189 posterior cells of the follicular epithelium that surrounds the egg chamber (Supplementary Figures 6  
190 and 7). Compared to the oocyte, MT organisation in follicle cells is less complex, and MT growth is  
191 known to be oriented predominantly outwards (towards basal) in a radial direction (Supplementary  
192 Movie 3). Importantly, OF analysis captures the directionality of MTs in the follicle cells accurately,  
193 proving the suitability of the approach to estimate MT orientation in cells. Furthermore, we analysed  
194 oocytes harbouring a mutation in *gurken* (*grk*), which exhibit polarity defects<sup>42,43</sup> as well as mis-  
195 oriented MT arrays<sup>44</sup>. As reported before, *grk* mutant oocytes fail to localise the nucleus and our OF  
196 analysis was able to detect an aberrant MT organisation (Supplementary Movie 4 and  
197 Supplementary Figure 6). EB1 signals showed a variable orientation from cell-to-cell, with an  
198 average posterior bias stronger than that found in control cells (Table 1). However, further analyses  
199 will be needed to fully understand the aberrant MT orientation in *grk* mutant cells. Nevertheless,  
200 taken together we could show that variational OF-based motion estimation provides a powerful and  
201 reliable tool to determine the global orientation of MT arrays and to detect alterations in those  
202 cytoskeletal networks from confocal image sequences.

### 203 204 **Cytoplasmic flows are sufficient to alter MT orientation in the oocyte**

205 In *capu* mutant oocytes, MTs display a higher degree of clustering, which may reflect a higher degree  
206 of bundling (Figure 1c). We used OF analysis to investigate whether the observed changes in MT  
207 bulk behaviour also affect the orientation of single filaments, and therefore the overall polarity of the  
208 MT network. We quantified the directionality of EB1 signals in *capu* mutant cells and observed  
209 substantial alterations (Figure 2n-r). Compared to controls, *capu* mutants exhibit a more stringent  
210 orientation of MT plus-tips, in which large amounts of comets were in close proximity to each other  
211 and growing in the same direction (Figure 2n and Supplementary Movie 5). From this we concluded  
212 that fast flows are sufficient to induce arrays of parallel filaments that grow in the same direction,  
213 and this finding strongly supports the observation that faster flows cause increased bundling of MTs  
214 (Figure 1). Consequently, the orientation of clustered MTs, and thus the direction of EB1 comets,  
215 showed a large variability in *capu* mutant cells (Figure 2o,p). However, the global posterior EB1  
216 orientation bias was only mildly decreased in *capu* mutants (Figure 2q vs. Figure 2l), indicating that  
217 this bias is primarily induced by other processes, like asymmetric nucleation and anchoring or the  
218 overall geometry of the cell. Nevertheless, due to the higher degree of variability, posterior-directed  
219 MTs grow less focused in *capu* mutants, with only 25% of EB1 signals directed towards the posterior

220 tip (Figure 2r vs. Figure 2m). Together these results demonstrate that cytoplasmic flows need to be  
221 in the right regime for MTs to maintain their proper organisation, and that faster advective motion is  
222 sufficient to change the state of bundling, focusing, and the orientation of MT growth.

223

### 224 **Cytoplasmic flows are necessary for MTs to display a wild-type organisation and correct** 225 **polar growth**

226 Our data demonstrate that faster cytoplasmic flows affect the spatial orientation of MTs in the oocyte.  
227 Thus, we wondered whether flows might actually be necessary to sustain a proper organisation of  
228 the MT network. To address this question, we first analysed the motion of Jup-labelled MTs in  
229 oocytes lacking *kinesin heavy chain* (*khc*). The loss of the motor subunit of Kin (*khc*<sup>27</sup>, from hereon  
230 called *khc*<sup>null</sup>) results in a complete absence of cargo transport towards the posterior pole and a lack  
231 of cytoplasmic flows (Figure 3a and Supplementary Figure 9)<sup>12,45</sup>. Compared to control cells, MTs in  
232 *khc*<sup>null</sup> mutant oocytes display very little overall motion and appear rather stiff and immobile (Figure  
233 3f,d and Supplementary Movie 6).

234 However, oocytes without Kin do not only lack cytoplasmic flows and transport to the posterior, but  
235 also display an abnormal actin mesh (Supplementary Figure 8)<sup>19</sup>. To test, whether the altered bulk  
236 behaviour of MTs is due to the lack of flows or other aberrations linked to a complete loss of Kin, we  
237 monitored MTs in oocytes that carry distinct mutations in the Kin motor domain, resulting in a slower  
238 motor (two mutant alleles known as *khc*<sup>23</sup> and *khc*<sup>17</sup>, hereafter summarised as *khc*<sup>slow</sup>)<sup>46</sup>. St9 *khc*<sup>slow</sup>  
239 oocytes display a normal cytoplasmic actin mesh (Supplementary Figure 8) and are able to transport  
240 a considerable amount of cargo towards the posterior (Figure 3b,c)<sup>47,48</sup>. Importantly, and as in *khc*<sup>null</sup>  
241 cells, they lack any cytoplasmic flows, allowing us to study the impact of advection in the presence  
242 of transport (Supplementary Figure 9)<sup>48</sup>. MTs in *khc*<sup>slow</sup> oocytes display the same immobile  
243 behaviour, similar to cells lacking the motor entirely (Supplementary Movie 6). They also appear  
244 rather stiff and no motion could be detected in kymographs (Figure 3e,f). These observations  
245 strongly indicate that the altered behaviour of MTs in oocytes without Kin is indeed due to a lack of  
246 cytoplasmic flows. Thus, cytoplasmic advection is necessary for MTs to display a dynamic wild-type  
247 behaviour.

248 We next analysed EB1 directionality in *khc*<sup>slow</sup> oocytes (Figure 3g-k). As in control cells, we observed  
249 dynamic EB1 comets throughout the cytoplasm (Supplementary Movie 7). However, in stark  
250 contrast, the distribution of orientation angles displayed a more focussed bias towards the posterior  
251 of the cell (Figure 3i vs. Figure 2k). Consequently, *khc*<sup>slow</sup> mutant oocytes display an increased  
252 posterior plus-tip bias, with 75% of EB1 signals directed towards posterior, compared to 66% in  
253 control cells (Figure 3j vs. Figure 2l and Table 1). Furthermore, 54% of these posterior-directed EB1  
254 signals displayed a posterior tip orientation, as compared to 40% in controls (Figure 3k vs. Figure  
255 2m and Table 1). These findings indicate that the orientation of the growing MT plus ends in st9  
256 oocytes does not only depend on nucleation or anchoring of minus ends, but also on the presence



257 of well-regulated cytoplasmic flows. In other words, flows are necessary for MTs to display a correct  
258 polar growth.

259 Surprisingly, we found that the complete lack of Kin did not result in major changes of the global  
260 average MT orientation (Supplementary Movie 7). Unlike *khc<sup>slow</sup>* oocytes, *khc<sup>null</sup>* cells display a mean  
261 angular direction, posterior orientation bias and plus-tip growth towards the posterior tip that is similar  
262 to that of controls (Figure 3l-p, Table 1). This suggests that in the complete absence of Kin activity -  
263 and thus in the absence of cargo translocation - flows are not necessary for the correct polarisation  
264 of the MT network. While the precise molecular mechanism needs to be investigated in more detail,  
265 our data indicate that, in the presence of Kin-mediated transport, cytoplasmic flows are necessary  
266 for the wild-type organisation of MTs. It is relevant to point out that the Kin-dependent asymmetric  
267 accumulation of Oskar and Dynactin to the posterior pole, contributes to the regulation of MT growth  
268 in the posterior region of the oocyte<sup>3,49</sup>, and this transport process might be causative for the  
269 observed differences in MT polarity between the *khc<sup>slow</sup>* and the *khc<sup>null</sup>* oocytes.

270 To further investigate the impact of cytoplasmic flows and Kin activity on MT orientation, we analysed  
271 the regional organisation of the MT network along the A-P axis in control, *khc<sup>null</sup>*, and *khc<sup>slow</sup>* oocytes.  
272 We divided each oocyte into an anterior and a posterior region (Figure 4a), and analysed EB1  
273 directionality in each of these two regions (Table 1). As previously shown, in control cells the  
274 posterior EB1 bias increases along the A-P axis of the oocyte (Figure 4b-d)<sup>9</sup>. In the anterior region,  
275 we found 62% of signals directed towards posterior (Figure 4c), while this bias was increased to  
276 74% in the posterior region (Figure 4d). Interestingly, the percentage of signals pointing towards the  
277 'posterior tip' (as defined in Figure 2c) remained rather constant along the A-P axis (40% vs. 41%,  
278 Figure 4c,d and Table 1). As already demonstrated for the global posterior EB1 bias (Figure 4b),  
279 *khc<sup>slow</sup>* oocytes showed a dramatic change along the entire A-P axis, with a 74% posterior bias in  
280 the anterior region (Figure 4e vs. Figure 4c) and an even further increased 81% posterior bias in the  
281 posterior region (Figure 4f vs. Figure 4d). Additionally, the ratio of signals directed towards the  
282 'posterior tip' in both, anterior and posterior regions of the cell, was substantially increased (Figure  
283 4e,f and Table 1). This clearly demonstrates that slower Kin-mediated transport, and thus the lack  
284 of flows, cause a stronger polarisation of the entire MT network towards posterior. While the lack of  
285 Kin (*khc<sup>null</sup>*) seemed to cause only minor defects in the global organisation of the MT cytoskeleton,  
286 the regional analysis of EB1 directionality revealed substantial differences to both controls and  
287 *khc<sup>slow</sup>* oocytes. In the anterior region of *khc<sup>null</sup>* cells, we detected an unexpected drop of the posterior  
288 bias to only 56% - compared to 66% in controls -, which indicates that the complete lack of Kin-  
289 mediated transport along microtubules does indeed affect MT network organisation. Furthermore,  
290 we observed a less focused growth of plus-tips towards posterior (Figure 4g vs. Figures 4c,e). It  
291 needs to be mentioned here, that in contrast to *khc<sup>slow</sup>* cells, oocytes lacking Kin fail to localise their  
292 nucleus, which is known to be associated with MT minus ends<sup>50</sup>. Therefore, the observed MT  
293 behaviour in *khc<sup>null</sup>* cells might reflect the mis-localisation of a certain subset of MTOCs in the cell.  
294 Contrary to the anterior region, in the posterior region of *khc<sup>null</sup>* oocytes the posterior bias of EB1

295 signals was found to be nearly unchanged, with 72% of posterior-directed signals in the mutant and  
296 74% in controls. Remarkably however, MTs in the posterior region of *khc<sup>null</sup>* cells displayed a more  
297 focused growth towards the posterior tip, similar to the slow Kin cells (Figure 4h vs. Figures 4d,f and  
298 Table 1).

299 Taken together, the data allows us to make certain interpretations about the relationship of Kin-  
300 activity, cytoplasmic flows, and the organisation of the MT cytoskeleton. Firstly, cytoplasmic flows  
301 are sufficient to regulate MT orientation and need to be in a defined regime to ensure proper MT  
302 polarisation. Secondly, in the presence of Kin-mediated transport, cytoplasmic flows are necessary  
303 to organise the correct posterior orientation bias and plus-tip focusing towards the posterior along  
304 the entire A-P axis. And thirdly, together with cytoplasmic flows, other Kin-mediated processes, such  
305 as cargo transport to the posterior or nucleus anchoring, affect the organisation of the MT network,  
306 supporting published work<sup>3,49</sup>.

307

### 308 **Reconstitution of cytoplasmic flows in *khc<sup>slow</sup>* oocytes rescues MT orientation**

309 Our data suggests that Kin-mediated cytoplasmic flows are necessary for the MT network to  
310 completely adopt its wild-type polarisation. However, since cargo transport is slightly affected in  
311 *khc<sup>slow</sup>* oocytes, we cannot rule out that mild transport defects also contribute to the aberrant MT  
312 orientation detected in those cells. Similarly, *capu* mutant oocytes fail to localise posterior cargo,  
313 although, it is unclear if this is solely due to faster streaming, and thus the misorientation of MTs, or  
314 whether this reflects other functions of the actin mesh or *capu*<sup>51</sup>. Previously, it was shown that cargo  
315 localisation defects in *capu* mutants can be rescued by introducing a *khc<sup>slow</sup>* mutation. It has also  
316 been suggested that fast flows in *capu* mutants are slowed down again by *khc<sup>slow</sup>*, but this  
317 assumption was never tested directly<sup>38</sup>.

318 To address this question, we generated a double mutant stock by meiotic recombination of the alleles  
319 *capu<sup>EY12344</sup>* and *khc<sup>17</sup>*. First, we investigated posterior cargo localisation in fixed cells. As expected,  
320 ~85% (n=20) of *capu,khc<sup>slow</sup>/+* cells (which are essentially *capu* mutant cells) failed to correctly  
321 localise Staufen to the posterior pole of the cell (Figure 5a). Although a weak crescent could usually  
322 be detected, most Staufen protein localised to cytoplasmic clouds in the middle of the cells (Figure  
323 5a vs. Figure 1f). In comparison, ~72% (n=25) of *capu,khc<sup>slow</sup>* double mutant cells localised Staufen  
324 into a posterior crescent. However, the majority of those cells (n=11/18) also showed Staufen  
325 accumulation in posterior dots, a phenotype that is usually associated with the *khc<sup>slow</sup>* alleles (Figure  
326 5b vs. Figure 3b,c). These data confirmed that the generated double mutant is comparable to the  
327 previously reported allele<sup>38</sup>, and that slow Kin is sufficient to rescue the major cargo localisation  
328 defects seen in *capu* mutants. Conversely, since cargo transport was not rescued to wild-type levels,  
329 and found to be similar to that observed in *khc<sup>slow</sup>* oocytes<sup>47</sup>, it is clear that the decreased cargo  
330 transport efficiency of slow Kin cannot be rescued by re-introducing cytoplasmic flows by the lack of  
331 *capu*. However, it is still unclear whether this is still due to a reduced translocation speed of slow  
332 Kin, or to a defect in cargo anchoring in *capu* mutant cells<sup>51</sup>.

333 Next we tested whether fast cytoplasmic flows in *capu* mutants are indeed rescued in *capu,khc<sup>slow</sup>*  
334 oocytes. As expected, and similar to *capu* single mutants, *capu,khc<sup>slow</sup>/+* cells displayed fast  
335 streaming and MTs that strongly clustered or bundled in the anterior part of the cell (Figure 5c,  
336 Supplementary Movie 8). In contrast, cytoplasmic flows in *capu,khc<sup>slow</sup>* double mutant cells were  
337 slowed down again and appeared similar to those observed in control cells (Supplementary Figure  
338 9). Most importantly, and as suggested before<sup>38</sup>, the bulk movement of MTs in *capu,khc<sup>slow</sup>* double  
339 mutants also resembled that of control cells, strongly supporting that cytoplasmic flows are a major  
340 factor contributing to normal MT bulk movement (Figure 5d vs. Figure 1a and Supplementary Movie  
341 8).

342 To finally test whether the re-establishment of cytoplasmic flows in a *khc<sup>slow</sup>* background (or the  
343 reduction of flow speeds in *capu* background) also rescues MT orientation, we analysed EB1  
344 directionality in *capu,khc<sup>slow</sup>/+* (Figure 5e-i) and *capu,khc<sup>slow</sup>* double mutant oocytes (Figure 5j-n and  
345 Supplementary Movie 9). As demonstrated for *capu* single mutants, EB1 comets in *capu,khc<sup>slow</sup>/+*  
346 oocytes exhibited an increased parallel motion (Supplementary Movie 9). Similar to *capu* single  
347 mutants, the posterior bias of EB1 comets displayed a large cell-to-cell variability (Figure 5f,g) and  
348 was on average slightly reduced, with 61% of signals pointing towards posterior in *capu,khc<sup>slow</sup>/+*  
349 cells, compared to 66% in controls (Figure 5h vs. Figure 2l). Furthermore, the fraction of signals  
350 pointing towards the posterior tip was found reduced to 34%, as compared to 40% in control cells  
351 (Figure 5i and Table 1). These values are similar to what we observed in *capu* mutants (Figure 2n-  
352 r), suggesting that the heterozygous presence of a *khc<sup>slow</sup>* mutant chromosome does not  
353 substantially affect the *capu* mutant phenotype. Conversely, EB1 comets in *capu,khc<sup>slow</sup>* double  
354 mutant cells displayed a less clustered motion (Figure 5j and Supplementary Movie 9) and a  
355 posterior orientation bias comparable to that of control cells (66% posterior bias Figure 5m vs. Figure  
356 2l and Table 1). Finally, also the fraction of EB1 signals pointing towards the 'posterior tip' was found  
357 to be similar in *capu,khc<sup>slow</sup>* double mutant cells (39%) and controls (40%) (Figure 5n vs. Figure 2m  
358 and Table 1), further strengthening the idea that cytoplasmic flows constitute a substantial  
359 contributor to a correct MT organisation in the oocyte.

360 In summary, our results demonstrate that in the absence of *capu* and the actin mesh, *khc<sup>slow</sup>* is  
361 sufficient to restore the correct regime of cytoplasmic flows, resulting in a correct polarisation and  
362 organisation of the MT cytoskeleton. Therefore, it seems that the actin mesh is absolutely essential  
363 in oocytes that exhibit normal Kin-mediated transport, in order to ensure the proper regulation of  
364 cytoplasmic flows, which in turn is an important contributor to the observed MT orientation. However,  
365 our analysis in the double mutant also suggests that the actin mesh is not absolutely essential for  
366 correct orientation of MT plus ends, indicating that plus-end guiding mechanisms as observed in  
367 other cells types<sup>52</sup> might only play a minor role in the oocyte.

## 368 **DISCUSSION**

369 Here we have developed a novel methodology for the reliable and efficient quantitative description  
370 of growth directionality of EB1 comets from confocal image sequences. Our two-step image analysis  
371 approach is based on a rigorous computational framework and allows to infer approximate velocities  
372 (direction and speed) of EB1 comets. Most importantly, the methodology does not require  
373 demanding imaging techniques or computing hardware. The use of a highly efficient iterative  
374 optimisation algorithm enabled us to analyse entire image sequences at once, as compared to a  
375 frame-by-frame analysis. In comparison to existing techniques, such as particle tracking or PIV, OF  
376 allows us to perform robust motion estimation on pixel level in challenging circumstances, such as  
377 low signal-to-noise ratios and small particle sizes. Moreover, the image analysis depends only on  
378 few parameters that can be easily adjusted. Mainly due to its large size (80-100  $\mu\text{m}$  along the A-P  
379 axis) and the fact that MT minus ends are nucleated and anchored along the antero-lateral  
380 membranes of the cell, the *Drosophila* st9 oocyte is arguably one of the most challenging *in vivo*  
381 systems in which to analyse the dynamic behaviour of growing MT plus ends. The use of confocal  
382 microscopy, together with the above-mentioned computational tools, allowed us for the first time to  
383 quantify growth directionality of plus ends within a 2D focal plane along the entire oocyte. However,  
384 two limitations of the developed methodology need to be pointed out. Firstly, due to the use of a  
385 variational framework for the image analysis, both the denoised sequences and the estimated  
386 velocities exhibit a loss of contrast, leading to underestimated speeds of EB1 comets. This is  
387 particularly due to the temporal regularisation required in both steps to overcome the above-  
388 mentioned challenges. Moreover, the small size of EB1 comets and the high noise level proved the  
389 application of techniques that are typically used to estimate large displacements, such as coarse-to-  
390 fine warping-based OF<sup>53</sup>, unfeasible. Secondly, our statistical analyses of growth directions of EB1  
391 comets are based on velocities computed for all pixels within each segmented oocyte. We are aware  
392 that not every image pixel portrays exactly one EB1 comet. In summary, the results however  
393 demonstrate that our approach will be able to identify plus end growth directionality in most, if not  
394 all, cell types and thus constitutes an efficient and reliable analytical framework for MT polarity  
395 studies.

396 Together with others, the present study supports the picture of a complex mechanical and/or  
397 biochemical relationship between motion of cytoplasmic components (whether by flows or by  
398 transport), cytoplasmic F-actin and MTs in the *Drosophila* oocyte. This holds true for our model  
399 system, but is likely transferable to many other cell types. Kin-mediated cargo transport through a  
400 highly viscous medium such as the cytoplasm inevitably induces bulk motion of such medium, which  
401 will cause lateral displacement forces on MTs and thus induces a feed-back on their orientation. As  
402 a consequence, cytoplasmic flows need to be kept at a lower speed and at a biased random pattern  
403 in order for the MT network to properly polarise. In the absence of the actin mesh (as in *capu*  
404 mutants), there is an increased persistence and speed of flows, resulting in parallel alignment and  
405 possibly bundling of MTs, as well as strong defects on MT orientation. The actin mesh - which itself

406 requires Kin activity for its proper organisation<sup>19</sup> - is required for the maintenance of this correct  
407 regime of flows.

408 However, it is still unknown how the actin mesh slows down Kin-dependent cytoplasmic flows or how  
409 it might affect MT organisation. It has been proposed that the presence of a viscoelastic actin network  
410 can increase the effective viscosity of the cytoplasm, and counteract the viscous drag of cargo  
411 transport by Kin<sup>54</sup>. Furthermore, in *in vitro* systems, actin-microtubule crosslinking proteins have  
412 been demonstrated to allow a potent crosstalk between both filament species, and thus have  
413 proposed to coordinate cytoskeletal organisation. However, our data from *capu,khc<sup>slow</sup>* double  
414 mutant oocytes, which do not form an actin mesh, suggest that the mesh is not absolutely essential  
415 to allow a correct MT orientation. In this 'artificial' mutant situation, the correct regime of flows seems  
416 sufficient to allow proper MT network organisation. This is supported by published work showing that  
417 the actin mesh is not altered in colchicine treated oocytes, making a direct crosslinking mechanism  
418 between MTs and actin filaments unlikely<sup>38</sup>. Together this shows that in our system, the presence of  
419 an F-actin mesh, surrounding MTs, is not absolutely essential to polarise the network. However,  
420 other dynamic MT behaviours, such as bending and undulation of single filaments might still be  
421 affected, as shown in other as systems<sup>55-58</sup>.

422 Lastly, it is reasonable to suspect the actin mesh to regulate the activity of Kin more directly, for  
423 example by tethering it to its filaments (directly or indirectly through cargo). Such model is supported  
424 by our finding that Kin becomes efficiently recruited to MTs when the mesh is absent (Supplementary  
425 Movie 10 and Figure 6). We expressed a KHC::GFP fusion protein (amino acids 1-700) in the female  
426 germline, which localises to a posterior cloud and is thought not to interact with any cargo (Figure  
427 6)<sup>50</sup>. We found that in control oocytes, this protein only weakly co-localises with MTs, both in fixed  
428 and living samples. Upon loss of *capu* however, the fusion protein strongly decorated MTs in the  
429 entire cell, suggesting that the actin mesh directly alters the ability of Kin to bind MTs (Figure 6 and  
430 Supplementary Movie 10). While these observations are preliminary, they could explain how the  
431 mesh regulates cytoplasmic flows in the first place, but also the higher degree of MT bundling in fast  
432 flowing oocytes by an effective crosslinking of adjacent filaments by the higher amount of recruited  
433 Kin<sup>18</sup>.

434 Our data establish cytoplasmic flows in *st9* oocytes as a contributing factor for the correct  
435 organisation of the MT cytoskeleton. Previous studies suggested that the pattern of nucleation and  
436 minus end anchoring along the cortex are sufficient to organise the MT network and to allow correct  
437 cargo transport to define the A-P axis of the animal. Consequently, mutant oocytes harbouring  
438 defects in nucleation and/or anchoring of minus ends display polarity defects<sup>10,11</sup>. Furthermore,  
439 mathematical modelling suggested that cytoplasmic flows at mid-oogenesis are negligible to explain  
440 the correct localisation of posterior cargoes like *oskar* mRNA<sup>59</sup>. However, our analysis now  
441 demonstrates that dynamic bending of MT filaments in the oocyte takes place, and is mostly driven  
442 by cytoplasmic flows. Since we also find that these flows are involved in the orientation of MTs plus

443 ends, we can conclude that the localisation of the minus ends alone is not enough to define the  
444 precise organisation of the network. This was most obvious in *khc<sup>slow</sup>* oocytes, which in our hands  
445 lack cytoplasmic flows entirely, and displayed an increased posterior orientation bias (Figure 3). The  
446 advantage of analysing slow Kin mutants is that other Kin-dependent processes, like cargo transport  
447 and formation of the actin mesh do take place<sup>19,60</sup>. Despite showing only mild defects in the  
448 distribution of developmental determinants, *khc<sup>slow</sup>* mutant oocytes frequently fail to give rise to a  
449 healthy offspring, suggesting that oocyte polarisation is affected<sup>61</sup>. Consistently, we found an  
450 increased posterior bias of EB1 signals in *khc<sup>slow</sup>* mutant oocytes, strongly suggesting that the lack  
451 of cytoplasmic flows was causative for this observation.

452 If and how a stronger posterior polarisation of the MT network may affect cargo delivery to the  
453 posterior is unknown. Tracking *oskar* particles in *khc<sup>slow</sup>* oocytes did not reveal a stronger orientation  
454 bias of cargo movement<sup>49</sup>. However, it is unclear whether trajectories of *oskar* transport always  
455 reflect the organisation of the underlying MT network, and whether all MTs would be equally used  
456 by slow Kin motor/cargo complexes. In mammalian cells, Kin preferentially moves along stable, post-  
457 translationally modified MTs<sup>62</sup>. Compared to other cells, MTs in the oocyte are very sensitive against  
458 colchicine treatment and appear heavily tyrosinated, a marker of unstable MT filaments<sup>63</sup>.

459 In the absence of Kin-mediated cargo transport (*khc<sup>null</sup>*), cytoplasmic flows are dispensable for the  
460 global posterior MT bias. When analysed only in the posterior region of the oocyte, *khc<sup>null</sup>* cells did  
461 exhibit a weakly increased posterior bias (Figure 4h), which was not as strong as observed in *khc<sup>slow</sup>*  
462 cells (Figure 4f). Besides developmental determinants, Kin also transports the dynein/dynactin motor  
463 complex towards the plus end of MTs, which causes a stabilisation of MT growth and consequently  
464 amplifies the posterior orientation bias. The lack of Dynactin transport towards the plus end in *khc<sup>null</sup>*  
465 oocytes could therefore contribute to the weaker effects seen on the posterior EB1 bias in these  
466 mutants (Figure 4).

467 In summary, the combination of various forces produced within living cells demands a complex set  
468 of biochemical and biomechanical regulatory mechanisms for cytoskeletal networks to organise  
469 correctly. Consequently, this calls for a combination of different experimental approaches in order to  
470 fully understand the dynamic organisation of cytoskeletons, from simplified *in vitro* systems to *in vivo*  
471 quantitative analysis. Our results show that, in oocytes, advection by cytoplasmic flows contributes  
472 to the polarisation of MTs by affecting the direction of growth of the plus ends.

## 473 REFERENCES

- 474 1. Mitchison, T. & Kirschner, M. Dynamic instability of microtubule growth. *Nature* **312**, 237–242  
475 (1984).
- 476 2. Akhmanova, A. & Steinmetz, M. O. Control of microtubule organization and dynamics: two  
477 ends in the limelight. *Nat. Rev. Mol. Cell Biol.* **16**, 711–726 (2015).
- 478 3. Nieuwburg, R. *et al.* Localised dynactin protects growing microtubules to deliver *oskar* mRNA  
479 to the posterior cortex of the *Drosophila* oocyte. *eLife Sciences* **6**, e27237 (2017).
- 480 4. Purro, S. A. *et al.* Wnt Regulates Axon Behavior through Changes in Microtubule Growth  
481 Directionality: A New Role for Adenomatous Polyposis Coli. *J. Neurosci.* **28**, 8644–8654  
482 (2008).
- 483 5. Fassier, C. *et al.* Motor axon navigation relies on Fidgetin-like 1–driven microtubule plus end  
484 dynamics. *J. Cell Biol.* **217**, 1719–1738 (2018).
- 485 6. Kent, I. A., Rane, P. S., Dickinson, R. B., Ladd, A. J. C. & Lele, T. P. Transient Pinning and  
486 Pulling: A Mechanism for Bending Microtubules. *PLoS ONE* **11**, e0151322 (2016).
- 487 7. Jiang, K. *et al.* A Proteome-wide Screen for Mammalian SxIP Motif-Containing Microtubule  
488 Plus-End Tracking Proteins. *Current Biology* **22**, 1800–1807 (2012).
- 489 8. Kodama, A., Karakesisoglou, I., Wong, E., Vaezi, A. & Fuchs, E. ACF7: An essential integrator  
490 of microtubule dynamics. *Cell* **115**, 343–354 (2003).
- 491 9. Parton, R. M. *et al.* A PAR-1-dependent orientation gradient of dynamic microtubules directs  
492 posterior cargo transport in the *Drosophila* oocyte. *The Journal of Cell Biology* **194**, 121–135  
493 (2011).
- 494 10. Nashchekin, D., Fernandes, A. R. & St Johnston, D. Patronin/Shot Cortical Foci Assemble  
495 the Noncentrosomal Microtubule Array that Specifies the *Drosophila* Anterior-Posterior Axis.  
496 *Dev. Cell* **38**, 61–72 (2016).
- 497 11. Doerflinger, H., Benton, R., Torres, I. L., Zwart, M. F. & St Johnston, D. *Drosophila* anterior-  
498 posterior polarity requires actin-dependent PAR-1 recruitment to the oocyte posterior. *Current*  
499 *Biology* **16**, 1090–1095 (2006).
- 500 12. Palacios, I. M. & St Johnston, D. *Kinesin light chain*-independent function of the *Kinesin heavy*  
501 *chain* in cytoplasmic streaming and posterior localisation in the *Drosophila* oocyte.  
502 *Development* **129**, 5473–5485 (2002).
- 503 13. Ganguly, S., Williams, L. S., Palacios, I. M. & Goldstein, R. E. Cytoplasmic streaming in  
504 *Drosophila* oocytes varies with kinesin activity and correlates with the microtubule  
505 cytoskeleton architecture. *Proc. Natl. Acad. Sci. U.S.A.* **109**, 15109–15114 (2012).
- 506 14. Hurd, T. R. *et al.* Long Oskar Controls Mitochondrial Inheritance in *Drosophila melanogaster*.  
507 *Dev. Cell* **39**, 560–571 (2016).
- 508 15. Forrest, K. M. & Gavis, E. R. Live imaging of endogenous RNA reveals a diffusion and  
509 entrapment mechanism for *nanos* mRNA localization in *Drosophila*. *Curr. Biol.* **13**, 1159–1168  
510 (2003).

- 511 16. Lu, W. *et al.* Ooplasmic flow cooperates with transport and anchorage in *Drosophila* oocyte  
512 posterior determination. *The Journal of Cell Biology* **217**, 3497–3511 (2018).
- 513 17. Monteith, C. E. *et al.* A Mechanism for Cytoplasmic Streaming: Kinesin-Driven Alignment of  
514 Microtubules and Fast Fluid Flows. *Biophys. J.* **110**, 2053–2065 (2016).
- 515 18. Lu, W., Winding, M., Lakonishok, M., Wildonger, J. & Gelfand, V. I. Microtubule-microtubule  
516 sliding by kinesin-1 is essential for normal cytoplasmic streaming in *Drosophila* oocytes. *Proc.*  
517 *Natl. Acad. Sci. U.S.A.* **113**, E4995–5004 (2016).
- 518 19. Drechsler, M., Giavazzi, F., Cerbino, R. & Palacios, I. M. Active diffusion and advection in  
519 *Drosophila* oocytes result from the interplay of actin and microtubules. *Nat Comms* **8**, 1520  
520 (2017).
- 521 20. Shimada, Y., Yonemura, S., Ohkura, H., Strutt, D. & Uemura, T. Polarized transport of Frizzled  
522 along the planar microtubule arrays in *Drosophila* wing epithelium. *Dev. Cell* **10**, 209–222  
523 (2006).
- 524 21. Horn, B. K. P. & Schunck, B. G. Determining optical flow. *Artificial Intelligence* **17**, 185–203  
525 (1981).
- 526 22. Vig, D. K., Hamby, A. E. & Wolgemuth, C. W. On the Quantification of Cellular Velocity Fields.  
527 *Biophys. J.* **110**, 1469–1475 (2016).
- 528 23. Ruhnau, P., Kohlberger, T., Schnörr, C. & Nobach, H. Variational optical flow estimation for  
529 particle image velocimetry. *Experiments in Fluids* **38**, 21–32 (2005).
- 530 24. Amat, F., Myers, E. W. & Keller, P. J. Fast and robust optical flow for time-lapse microscopy  
531 using super-voxels. *Bioinformatics* **29**, 373–380 (2013).
- 532 25. Boric, K., Orio, P., Viéville, T. & Whitlock, K. Quantitative analysis of cell migration using  
533 optical flow. *PLoS ONE* **8**, e69574 (2013).
- 534 26. Guo, D., van de Ven, A. L. & Zhou, X. Red blood cell tracking using optical flow methods.  
535 *IEEE J Biomed Health Inform* **18**, 991–998 (2014).
- 536 27. Lombardot, B. *et al.* Evaluation of four 3D non rigid registration methods applied to early  
537 zebrafish development sequences. In *Proceedings of the Third MICCAI Workshop on*  
538 *Microscopic Image Analysis with Applications in Biology* (2008).
- 539 28. Melani, C. *et al.* Cells tracking in a live zebrafish embryo. *Conf Proc IEEE Eng Med Biol Soc*  
540 **2007**, 1631–1634 (2007).
- 541 29. Pizarro, L., Delpiano, J., Aljabar, P., Ruiz-del-Solar, J. & Rueckert, D. Towards dense motion  
542 estimation in light and electron microscopy. in 1939–1942 (IEEE, 2011).  
543 doi:10.1109/ISBI.2011.5872789
- 544 30. Schmid, B. *et al.* High-speed panoramic light-sheet microscopy reveals global endodermal  
545 cell dynamics. *Nat Comms* **4**, (2013).
- 546 31. Kirisits, C., Lang, L. F. & Scherzer, O. Optical Flow on Evolving Surfaces with Space and Time  
547 Regularisation. *Journal of Mathematical Imaging and Vision* **52**, 55–70 (2015).



- 548 32. Boquet-Pujadas, A. *et al.* BioFlow: a non-invasive, image-based method to measure speed,  
549 pressure and forces inside living cells. *Scientific Reports* **7**, (2017).
- 550 33. Huang, Y., Hao, L., Li, H., Liu, Z. & Wang, P. Quantitative Analysis of Intracellular Motility  
551 Based on Optical Flow Model. *J Healthc Eng* **2017**, 1848314 (2017).
- 552 34. Delpiano, J. *et al.* Performance of optical flow techniques for motion analysis of fluorescent  
553 point signals in confocal microscopy. *Machine Vision and Application* (2012).  
554 doi:10.1007/s00138-011-0362-8
- 555 35. Frerking, L., Burger, M., Vestweber, D. & Brune, C. TGV-based flow estimation for 4D  
556 leukocyte transmigration. in 79–83 (IOP, 2014).
- 557 36. Karpova, N., Bobinnec, Y., Fouix, S., Huitorel, P. & Debec, A. Jupiter, a new *Drosophila*  
558 protein associated with microtubules. *Cell Motil. Cytoskeleton* **63**, 301–312 (2006).
- 559 37. Theurkauf, W. E. Premature Microtubule-Dependent Cytoplasmic Streaming in Cappuccino  
560 and Spire Mutant Oocytes. *Science* **265**, 2093–2096 (1994).
- 561 38. Dahlgaard, K., Raposo, A. A. S. F., Niccoli, T. & St Johnston, D. Capu and Spire assemble a  
562 cytoplasmic actin mesh that maintains microtubule organization in the *Drosophila* oocyte. *Dev.*  
563 *Cell* **13**, 539–553 (2007).
- 564 39. Quinlan, M. E. Direct interaction between two actin nucleators is required in *Drosophila*  
565 oogenesis. *Development* **140**, 4417–4425 (2013).
- 566 40. Rudin, L. I., Osher, S. & Fatemi, E. Nonlinear total variation based noise removal algorithms.  
567 *Physica D: Nonlinear Phenomena* **60**, 259–268 (1992).
- 568 41. Baker, S. *et al.* A Database and Evaluation Methodology for Optical Flow. *Int J Comput Vision*  
569 **92**, 1–31 (2011).
- 570 42. Gonzales-Reyes, A., Elliott, H. & St Johnston, D. Polarization of Both Major Body Axes in  
571 *Drosophila* by *Gurken-Torpedo* Signaling. *Nature* **375**, 654–658 (1995).
- 572 43. Roth, S., Shira Neuman-Silberberg, F., Barcelo, G. & Schüpbach, T. *cornichon* and the EGF  
573 receptor signaling process are necessary for both anterior-posterior and dorsal-ventral pattern  
574 formation in *Drosophila*. *Cell* **81**, 967–978 (1995).
- 575 44. Januschke, J. *et al.* Polar transport in the *Drosophila* oocyte requires Dynein and Kinesin I  
576 cooperation. *Curr. Biol.* **12**, 1971–1981 (2002).
- 577 45. Brendza, R. P., Serbus, L. R., Duffy, J. B. & Saxton, W. M. A Function for Kinesin I in the  
578 Posterior Transport of *oskar* mRNA and *Staufen* Protein. *Science* **289**, 2120–2122 (2000).
- 579 46. Brendza, K. M., Rose, D. J., Gilbert, S. P. & Saxton, W. M. Lethal kinesin mutations reveal  
580 amino acids important for ATPase activation and structural coupling. *J. Biol. Chem.* **274**,  
581 31506–31514 (1999).
- 582 47. Loiseau, P., Davies, T., Williams, L. S., Mishima, M. & Palacios, I. M. *Drosophila* PAT1 is  
583 required for Kinesin-1 to transport cargo and to maximize its motility. *Development* **137**, 2763–  
584 2772 (2010).

- 585 48. Serbus, L. R. Dynein and the actin cytoskeleton control kinesin-driven cytoplasmic streaming  
586 in *Drosophila* oocytes. *Development* **132**, 3743–3752 (2005).
- 587 49. Zimyanin, V. L. *et al.* In vivo Imaging of *oskar* mRNA transport reveals the mechanism of  
588 posterior localization. *Cell* **134**, 843–853 (2008).
- 589 50. Williams, L. S., Ganguly, S., Loiseau, P., Ng, B. F. & Palacios, I. M. The auto-inhibitory domain  
590 and ATP-independent microtubule-binding region of Kinesin heavy chain are major functional  
591 domains for transport in the *Drosophila* germline. *Development* **141**, 176–186 (2014).
- 592 51. Tanaka, T., Kato, Y., Matsuda, K., Hanyu-Nakamura, K. & Nakamura, A. *Drosophila* Mon2  
593 couples Oskar-induced endocytosis with actin remodeling for cortical anchorage of the germ  
594 plasm. *Development* **138**, 2523–2532 (2011).
- 595 52. Lopez, M. P. *et al.* Actin-microtubule coordination at growing microtubule ends. *Nat Comms*  
596 **5**, (2014).
- 597 53. Papenberg, N., Bruhn, A., Brox, T., Didas, S. & Weickert, J. Highly Accurate Optic Flow  
598 Computation with Theoretically Justified Warping. *Int J Comput Vision* **67**, 141–158 (2006).
- 599 54. Quinlan, M. E. Cytoplasmic Streaming in the *Drosophila* Oocyte. *Annu. Rev. Cell Dev. Biol.*  
600 **32**, 173–195 (2016).
- 601 55. Fakhri, N. *et al.* High-resolution mapping of intracellular fluctuations using carbon nanotubes.  
602 *Science* **344**, 1031–1035 (2014).
- 603 56. Katrukha, E. A. *et al.* Probing cytoskeletal modulation of passive and active intracellular  
604 dynamics using nanobody-functionalized quantum dots. *Nat Comms* **8**, 14772 (2017).
- 605 57. Brangwynne, C. P., MacKintosh, F. C. & Weitz, D. A. Force fluctuations and polymerization  
606 dynamics of intracellular microtubules. *Proc. Natl. Acad. Sci. U.S.A.* **104**, 16128–16133  
607 (2007).
- 608 58. Brangwynne, C. P. *et al.* Microtubules can bear enhanced compressive loads in living cells  
609 because of lateral reinforcement. *J. Cell Biol.* **173**, 733–741 (2006).
- 610 59. Khuc Trong, P., Doerflinger, H., Dunkel, J., St Johnston, D. & Goldstein, R. E. Cortical  
611 microtubule nucleation can organise the cytoskeleton of *Drosophila* oocytes to define the  
612 anteroposterior axis. *eLife Sciences* **4**, 4155 (2015).
- 613 60. Brendza, R. P., Serbus, L. R., Saxton, W. M. & Duffy, J. B. Posterior localization of dynein  
614 and dorsal-ventral axis formation depend on kinesin in *Drosophila* oocytes. *Curr. Biol.* **12**,  
615 1541–1545 (2002).
- 616 61. Moua, P., Fullerton, D., Serbus, L. R., Warrior, R. & Saxton, W. M. Kinesin-1 tail autoregulation  
617 and microtubule-binding regions function in saltatory transport but not ooplasmic streaming.  
618 *Development* **138**, 1087–1092 (2011).
- 619 62. Cai, D., McEwen, D. P., Martens, J. R., Meyhofer, E. & Verhey, K. J. Single Molecule Imaging  
620 Reveals Differences in Microtubule Track Selection Between Kinesin Motors. *PLOS Biology*  
621 **7**, e1000216 (2009).

- 622 63. Wang, Y. & Riechmann, V. Microtubule anchoring by cortical actin bundles prevents  
623 streaming of the oocyte cytoplasm. *Mech. Dev.* **125**, 142–152 (2008).
- 624 64. Chou, T. B. & Perrimon, N. The autosomal FLP-DFS technique for generating germline  
625 mosaics in *Drosophila melanogaster*. *Genetics* **144**, 1673–1679 (1996).
- 626 65. Schindelin, J. *et al.* Fiji: an open-source platform for biological-image analysis. *Nature*  
627 *Methods* **9**, 676–682 (2012).
- 628 66. Chambolle, A. & Pock, T. A First-Order Primal-Dual Algorithm for Convex Problems with  
629 Applications to Imaging. *Journal of Mathematical Imaging and Vision* **40**, 120–145 (2011).

630 **ACKNOWLEDGEMENTS**

631 We thank Dr D. St Johnston and I. Davis for reagents, and M. Wayland for assistance with imaging.  
632 We also thank Lena Frerking and Sujoy Ganguly for fruitful discussions during the initial phase of  
633 the project. MD and IMP were supported by the BBSRC, the University of Cambridge and Queen  
634 Mary University of London. MD was also supported by an Isaac Newton Trust fellowship and  
635 acknowledges funding by the DFG/SFB944 ('Physiology and Dynamics of Cellular  
636 Microcompartments'). LFL and CBS acknowledge support from the Leverhulme Trust ('Breaking the  
637 non-convexity barrier'), EPSRC (grant No. EP/M00483X/1), the EPSRC Centre (No. EP/N014588/1),  
638 the RISE projects CHiPS and NoMADS, the Cantab Capital Institute for the Mathematics of  
639 Information, and the Alan Turing Institute. MB und HD acknowledge support by the European  
640 Research Council (EU FP7-ERC Consolidator Grant No. 615216 LifeInverse). We gratefully  
641 acknowledge the support of NVIDIA Corporation with the donation of the Quadro P6000 GPU used  
642 for this research.

643

644 **AUTHOR CONTRIBUTIONS**

645 MD designed and performed experiments, analysed the data, discussed results and wrote the  
646 manuscript. IMP designed experiments, analysed the data, discussed results and wrote the  
647 manuscript. LFL and CBS developed the code required for the OF image analysis, analysed the  
648 data, discussed the results, and wrote the manuscript. HD developed code for the OF image  
649 analysis. MB contributed to the discussion and ideas during the initial implementation phase of the  
650 project.

651

652 **COMPETING INTERESTS**

653 The authors declare no competing financial interests.

654

655 **DATA AVAILABILITY**

656 The source code of our implementation and of the data analysis is available online  
657 (<https://doi.org/10.5281/zenodo.2573254>). All relevant data and the computational results are  
658 available from the corresponding authors upon request.

## 659 **METHODS**

### 660 **Fly stocks and genetics**

661 Flies were kept at standard corn meal agar and raised at room temperature (21°C). Detailed  
662 genotypes of all fly stocks can be found in Supplementary Table 1. Homozygous *capu* mutant flies  
663 were viable. Germ line clones for the analysis of *khc* mutant alleles have been induced by the  
664 FLP/FRT ovoD system<sup>64</sup>. Germline clones in Figure 5 were identified by the absence of nuclear GFP  
665 in germline cells.

666

### 667 **Live imaging**

668 Female flies of the desired genotypes were collected and fattened on dry yeast for 12-16 h prior to  
669 imaging. Ovaries were dissected in a small drop of halocarbon oil (Votalef S10, VWR) on a glass  
670 coverslip and single egg chambers were separated using fine tungsten needles. Images were  
671 acquired on a Leica SP5 inverted confocal microscope, using a 40×/1.3 Oil DIC Plan-Neofluar (Jup)  
672 or a 100×/1.4 Oil DIC objective (EB1). Signals were detected using a Leica HyD Hybrid Detector.  
673 For MT bulk movement, a single plane from the middle of the oocyte was imaged at a scan speed  
674 of 100 Hz and at an image resolution of 1,024 × 1,024 pixels (corresponding to one image every  
675 10.4 s). For EB1 imaging the oocyte was fitted and oriented within a 512 x 256 pixels frame and a  
676 single plane image was taken every 0.65 s. Image sequences of at least 100 frames (65 s) were  
677 taken, inspected visually, and bleach corrected using Fiji<sup>65</sup>.

678

### 679 **Immunostainings**

680 Egg chambers were dissected in PBS+0.1% Tween20 and fixed in 10% formaldehyde in PBS+0.1%  
681 Tween20 for 10 min. Fixed ovaries were incubated with an anti- $\alpha$ Tubulin primary antibody  
682 (MAB1864, Sigma-Aldrich, cloneYL1/2), diluted 1:100 in PBS+2% Tween20 over night at 4°. After  
683 four consecutive washes Alexa568-coupled secondary antibodies (1:100) were incubated were  
684 incubated for two hour at room temperature. Native fluorescence of GFP was imaged without  
685 amplification. Images were acquired on a Leica SP5 inverted confocal microscope, using a 40×/1.3  
686 Oil DIC Plan-Neofluar objective.

687

### 688 **Image denoising and optical flow (OF)-based motion estimation**

689 Motion analysis of the recorded two-dimensional image sequences was performed using a two-step  
690 procedure. The first step aimed to remove noise contamination from the unprocessed sequences,  
691 while the goal of the second step was to estimate displacement vector fields from the improved  
692 sequences. In the first step, we recovered from each noisy (grey-valued) image sequence  $u^\delta$  an  
693 improved version  $u$  by solving a variational image denoising problem with spatio-temporal  
694 regularisation. It reads

$$695 \quad u = \operatorname{argmin}_u \frac{1}{2} \|u - u^\delta\|^2 + \alpha_1 \|\nabla u\|_{2,1} + \frac{\beta_1}{2} \|\partial_t u\|^2.$$

696 While the first two terms on the right-hand side resemble standard image denoising with total  
697 variation regularisation<sup>40</sup> in space, the third term connects subsequent frames by penalising temporal  
698 changes in the recovered solution. As EB1 comets typically appear in several subsequent frames at  
699 similar positions, it allows to effectively remove randomly distributed noise from a sequence (see  
700 Figure 2d,e, Supplementary Movie 2, and Supplementary Methods). Here,  $\alpha, \beta > 0$  are  
701 regularisation parameters that balance the three terms and need to be chosen appropriately.  
702 Moreover, the norms are taken over the entire image sequence.  
703 The result  $u$  served as input to the motion estimation step, in which we estimated a displacement  
704 vector field  $v$  by solving

$$705 \quad v = \operatorname{argmin}_v \frac{1}{2} \|\partial_t u + \langle \nabla u, v \rangle\|^2 + \alpha_2 \|\nabla v\|_{2,1} + \frac{\beta_2}{2} \|\partial_t v\|_{2,2}^2.$$

706 Here, the first term on the right-hand side aims to approximately solve the optical flow equation<sup>21</sup>,  
707 while the second and third terms incorporate spatio-temporal regularisation of the vector-valued  
708 unknown (for a derivation of the model and further details see Supplementary Methods). The use of  
709 the vector-valued total variation allows for spatial discontinuities in the displacement vector field. We  
710 found that in both steps the temporal regularisation was key and the analysis of individual frames  
711 did not yield satisfactory results.

712 Both finite-dimensional minimisation problems were approximately solved using the primal-dual  
713 hybrid gradient method<sup>66</sup> and graphics-processing unit (GPU) acceleration. An in-depth description  
714 of both models, their numerical solution, and parameter choices as well as implementation details  
715 can be found in the Supplementary Methods.

716 **FIGURE LEGENDS**

Figure 1 - Drechsler and Lang et al.

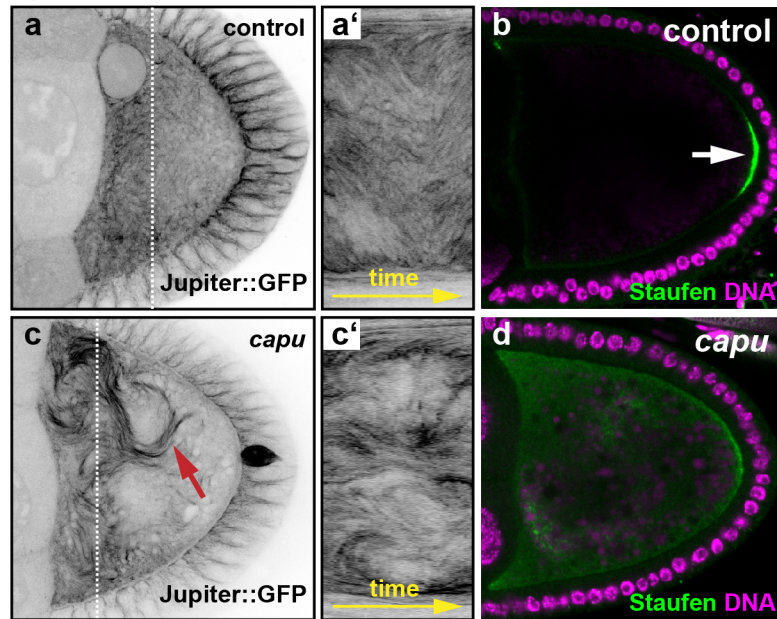

717

718 **Figure 1 – MT bulk movement in control and *capu* mutant oocytes and posterior cargo**  
719 **distribution. a)** Living control oocyte, expressing the MT-binding protein Jup (Supplementary Movie  
720 1). **a')** Kymograph/space-time plot (along the indicated dotted line in a), showing dynamic bending  
721 of MTs over time. **b)** Staufen (green) localisation in control. The protein localises in a tight posterior  
722 crescent by the end of st9. **c)** Living *capu* mutant oocyte, expressing Jup. Fast cytoplasmic flows,  
723 induced by the lack of the actin nucleator Cappuccino (*capu*), lead to the formation of dense and  
724 long MT bundles (red arrow), as well as an increased bending of MTs in the oocyte (Supplementary  
725 Movie 1). **c')** Kymograph (along dashed line in b) also indicates a stronger displacement of bundled  
726 MTs over time in *capu* mutants. **d)** Staufen fails to localise in *capu* mutants and distributed  
727 throughout the cytoplasm of the cell.

728

729

730

731

732

733

734

735

736

737

738

739

740

741

Figure 2 - Drechsler and Lang et al.

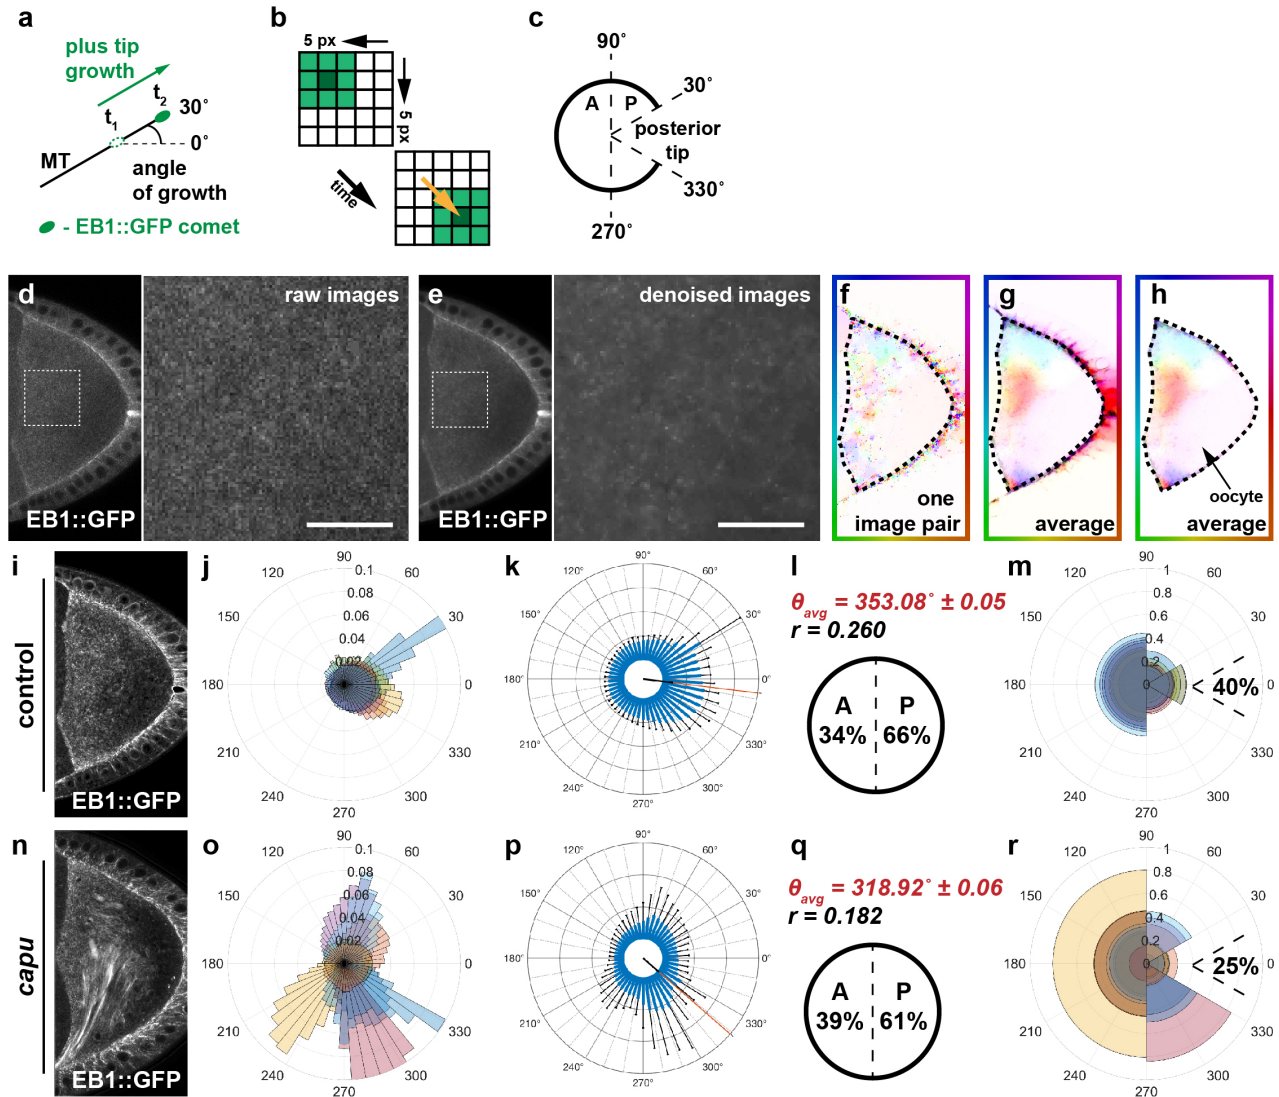

742

743 **Figure 2 – Optical flow analysis captures MT orientation in control and *capu* mutant oocytes.**

744 **a)** Schematic representation of MT orientation. EB1 specifically associates with the growing end

745 (plus-end) of MTs and therefore serves as read out of their spatial orientation. The orientation of MT

746 growth is represented as angle, deviating from an imaginary anterior (180°) to posterior axis (0°). **b)**

747 Simplified scheme that illustrates the underlying principle of OF-based motion estimation. Shown

748 are two consecutive frames of size 5 x 5 pixels of a synthetic image sequence that contains a

749 rectangular object of different pixel intensities - from light green (little signal) to dark green (maximum

750 signal). For better visibility an inverted colour scheme is used, as EB1 comets typically appear as

751 bright spots. OF assumes that the intensities of a signal do not change along its trajectory. Based

752 on this assumption, variational OF allows to estimate a displacement vector for each pixel (the yellow

753 arrow shows the displacement vector of the centre pixel of the object). **c)** Definition of growth

754 direction based on OF-estimated velocities. Angles of velocities between 90°-270° are regarded as

755 anterior (A), the complementary set of angles as posterior (P). Angles within the pool of posterior-

756 growing comets that fall between 330°-30° are considered to grow towards the posterior tip. **d)** Single

757 frame of an unprocessed image sequence (raw data) showing an oocyte expressing EB1. The

758 magnified area is indicated by a dashed box. **e)** Same frame as shown in (d), after applying the



759 denoising step (Supplementary Movie 2). Scale bars are 10  $\mu\text{m}$ . **f)** Shown is the optical flow  
760 (displacement vector field) between two frames of the image sequence in (a). **g)** Average optical  
761 flow (over all pairs of frames of the sequence). **h)** Hand-drawn segmentation mask of the oocyte.  
762 For the analysis, only the displacement vectors within this segmentation were considered. **i)**  
763 Standard deviation projection of EB1 comets in a control image sequence (in total 650 s). **j)** Rose  
764 diagram (angular histogram) with 50 bins depicting the distribution of EB1 growth directions in  
765 individual control cells within the corresponding segmented oocyte. Each colour represents the  
766 angular histogram of the directions from one oocyte. **k)** Same data as shown in (j) with angular  
767 histograms averaged over all cells ( $n=8$ ). Error bars (in black) indicate the standard deviation for  
768 each bin (in blue). **l)** Mean angular direction  $\theta_{\text{avg}}$  of the histogram shown in (k) (also indicated by a  
769 red line in (k)) and the length  $r$  (between 0 and 1) of the mean resultant vector (length of black line  
770 in (k) originating from the centre), which relates to the circular variance  $S = 1 - r$  of the distribution  
771 shown in (k). Anterior-posterior bias of all EB1 growth directions. **m)** Rose diagram similar to (j) for  
772 control cells but with growth directions binned into four bins ( $30^\circ$ - $90^\circ$ ,  $90^\circ$ - $270^\circ$ ,  $270^\circ$ - $330^\circ$ , and  $330^\circ$ -  
773  $30^\circ$ ). Moreover, the fraction of posterior-growing EB1 comets pointing towards the posterior tip ( $330^\circ$ -  
774  $30^\circ$ ) is indicated. **n-r)** Same representation as in (i)-(m) but for the estimated EB1 growth directions  
775 of *capu* mutant oocytes ( $n=10$ ).

776

777

778

779

780

781

782

783

784

785

786

787

788

789

790

791

792

793

794

795

796

Figure 3 - Drechsler and Lang et al.

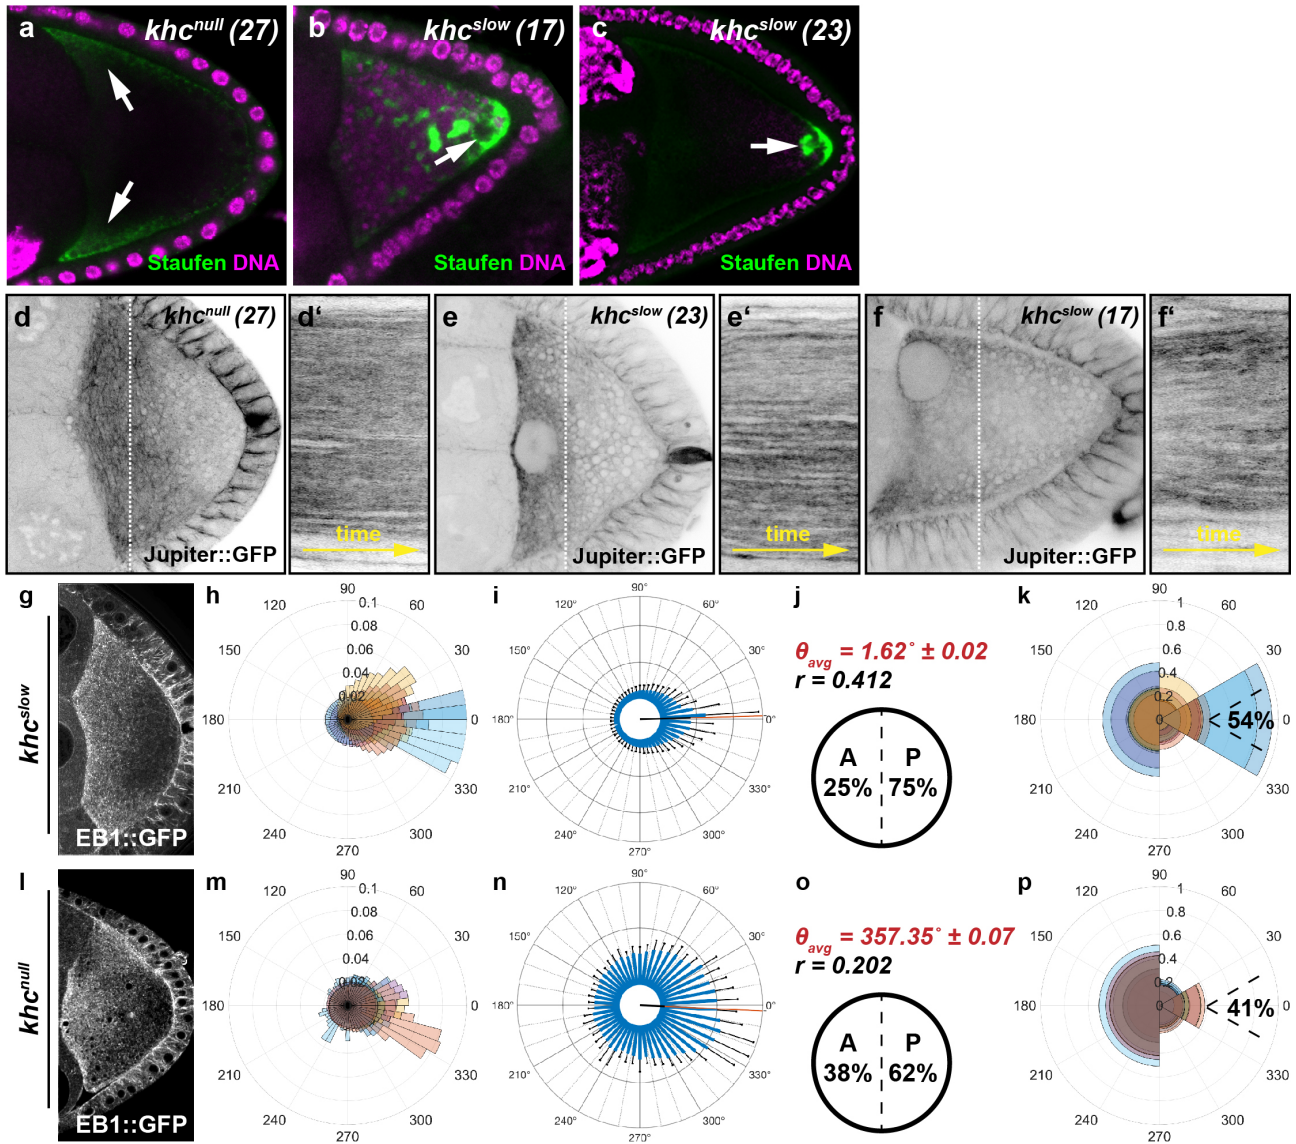

797

798 **Figure 3 – Kin activity impacts on the spatial orientation of MTs in the oocyte. a-c)** Posterior  
 799 cargo localisation in different *khc* mutant alleles. Staufen (green) is not transported in cells lacking  
 800 Kin (*khc*<sup>null</sup> (27)) and is found in the anterior corners of the cell (arrows). In contrast, in both of the  
 801 slow Kin alleles (*khc*<sup>slow</sup> (23) and *khc*<sup>slow</sup> (17)) a considerable amount of Staufen becomes transported  
 802 towards posterior. However, compared to controls (Figure 1b) Staufen does not localise in a tight  
 803 posterior crescent but rather in dots within the posterior cytoplasm (arrows). **d-f)** Still frames and  
 804 kymographs of live oocytes expressing Jup. Cells harbour a null mutation (*khc*<sup>null</sup> (27)), or single point  
 805 mutations (*khc*<sup>slow</sup> (23) and *khc*<sup>slow</sup> (17)) in the motor domain, rendering the motor slower. Compared  
 806 to controls, all *khc* mutant cells exhibit no cytoplasmic flows and thus no MT bulk motion  
 807 (Supplementary Movie 6). **g-p)** OF analysis of EB1 growth directionality in *khc*<sup>slow</sup> (g-k, n=10) and  
 808 *khc*<sup>null</sup> (l-p, n=10) oocytes.

809

810

811

812

Figure 4 - Drechsler and Lang et al.

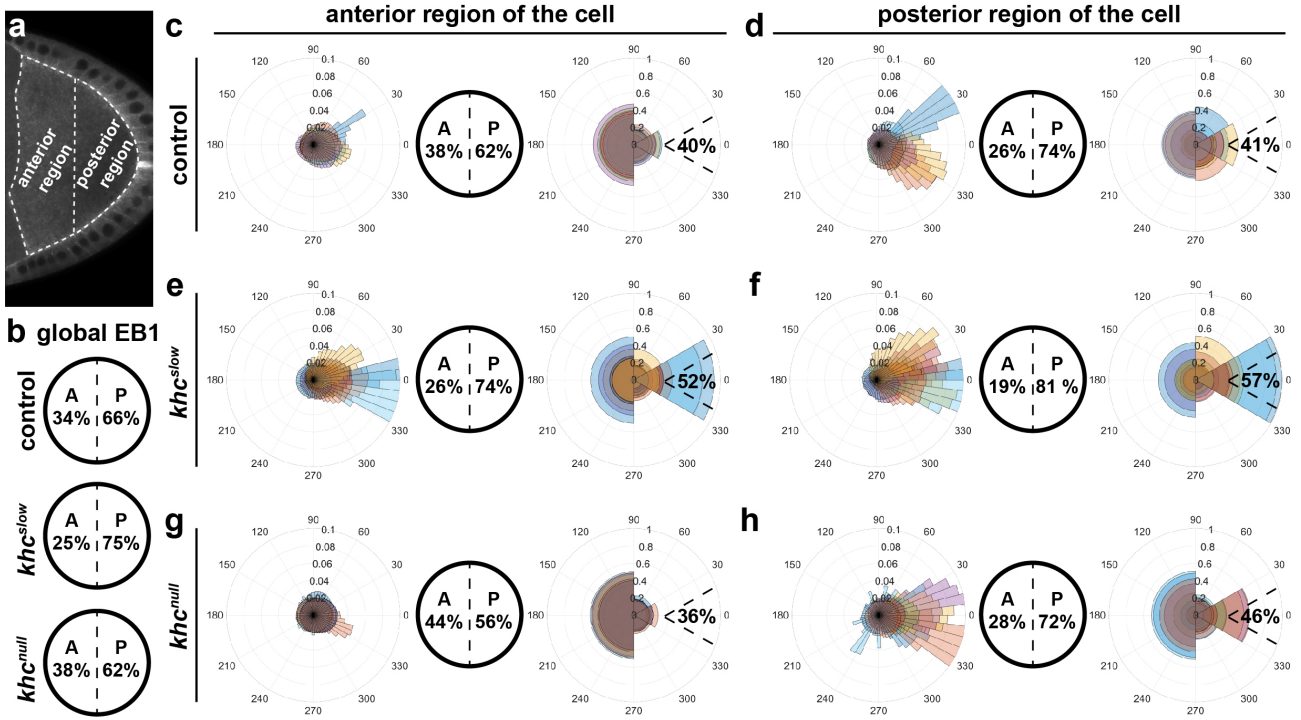

813

814

815

816

817

818

819

820

821

822

823

824

825

826

827

828

829

830

831

832

833

834

835

836

Figure 5 - Drechsler and Lang et al.

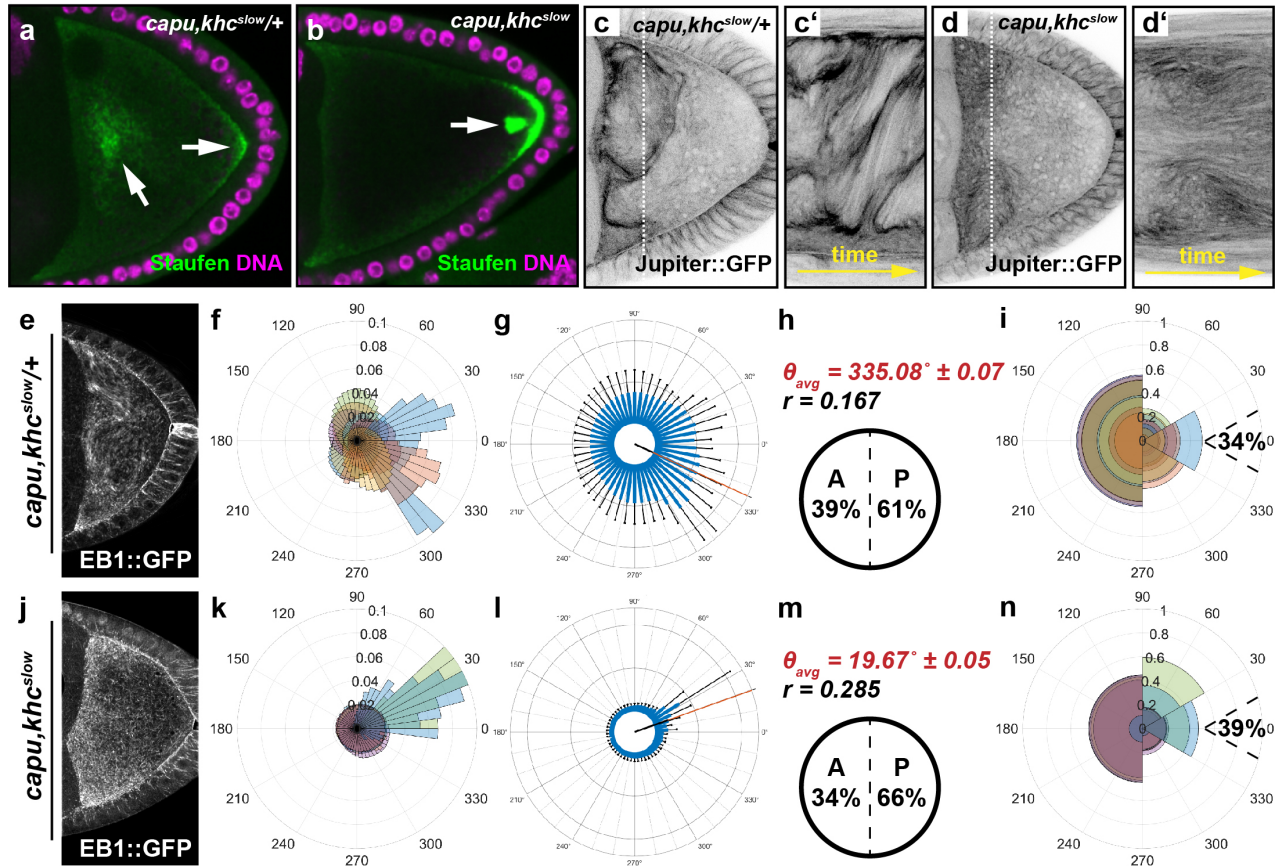

837

838

839

840

841

842

843

844

845

846

847

848

849

850

851

852

853

854

855

856

857

**Figure 5 – Cytoplasmic flows constitute a major contributor to MT orientation. a,b)** Posterior cargo localisation in *capu,khc<sup>slow/+</sup>* and *capu,khc<sup>slow</sup>* double mutant cells. In *capu,khc<sup>slow/+</sup>* oocytes, the majority of Staufen protein (green) localises as a cytoplasmic cloud (a). In *capu,khc<sup>slow</sup>* double mutant cells, Staufen localises in a posterior crescent but also accumulates in dots close to the posterior. **c,d)** Still frames and kymographs of live *capu,khc<sup>slow/+</sup>* (c,c') or *capu,khc<sup>slow</sup>* double mutant oocytes (d,d'), expressing Jup. **e-n)** OF analysis of EB1 growth directionality in *capu,khc<sup>slow/+</sup>* (e-i, n=10) and *capu,khc<sup>slow</sup>* (j-n, n=8) oocytes.

Figure 6 - Drechsler and Lang et al.

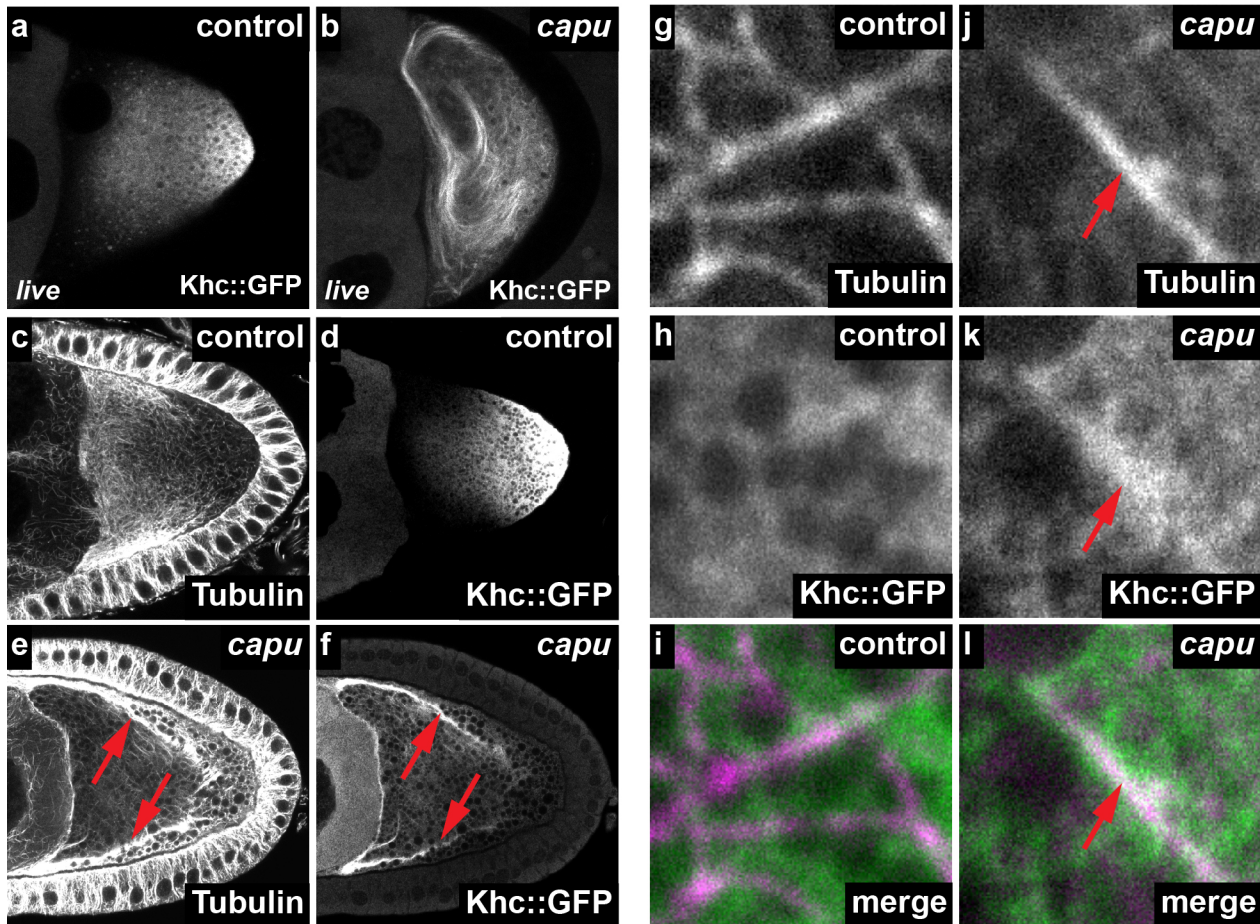

858

859

860

861

862

863

864

865

866

867

868

869

870

871

872

873

874

875

876

877

**Figure 6 – A potential link between the actin mesh and Kin recruitment to MTs. a,b)** Living control (a) and *capu* mutant oocyte (b), expressing Khc1-700::GFP. While the fusion protein mainly localises posteriorly in control cells (a), it strongly decorates MTs in *capu* mutant cells (b and Supplementary Movie 10). **c-f)** Fixed control oocytes (c,d) and *capu* mutants (e,f), expressing Khc::GFP. Cells were stained against  $\alpha$ Tubulin and the GFP fusion protein. In controls, Tubulin and Khc1-700::GFP localise to opposed gradients and show little or no overlap (c,d). Conversely, in *capu* mutants, Khc::GFP strongly co-localises to areas with high Tubulin intensity (red arrows in e,f). **g-l)** High resolution images of fixed control (g-i) and *capu* mutant (j-l) cells, stained against  $\alpha$ Tubulin (magenta) and GFP (green). While KHC::GFP localises diffusely around MTs in control cells (g-i), it strongly co-localises to MTs in *capu* mutants (red arrows in j-l)

Table 1 – Summary of EB1 orientation data, extracted from confocal time series by variational OF analysis.

| genotype                                     | n  | global EB1::GFP |         |             |                |       | EB1::GFP in anterior oocyte |         |             | EB1::GFP in posterior oocyte |         |             |
|----------------------------------------------|----|-----------------|---------|-------------|----------------|-------|-----------------------------|---------|-------------|------------------------------|---------|-------------|
|                                              |    | % ant.          | % post. | % post. tip | $\theta_{avg}$ | r     | % ant.                      | % post. | % post. tip | % ant.                       | % post. | % post. tip |
| control                                      | 8  | 34 ± 6          | 66 ± 6  | 40 ± 4      | 353.08±0.05    | 0.260 | 38 ± 5                      | 62 ± 5  | 40 ± 5      | 26 ± 11                      | 74 ± 11 | 41 ± 8      |
| grk                                          | 3  | 28 ± 72         | 72 ± 72 | 41 ± 44     | 329.65±0.07    | 0.339 |                             |         |             |                              |         |             |
| capu                                         | 10 | 39 ± 14         | 61 ± 14 | 25 ± 8      | 318.92±0.06    | 0.182 |                             |         |             |                              |         |             |
| khc <sup>null</sup>                          | 10 | 38 ± 6          | 62 ± 6  | 41 ± 7      | 357.35±0.07    | 0.202 | 44 ± 4                      | 56 ± 4  | 36 ± 3      | 28 ± 13                      | 72 ± 13 | 46 ± 13     |
| khc <sup>slow</sup>                          | 10 | 25 ± 10         | 75 ± 10 | 54 ± 15     | 1.62±0.02      | 0.412 | 26 ± 11                     | 74 ± 11 | 52 ± 14     | 19 ± 10                      | 81 ± 10 | 57 ± 17     |
| capu,khc <sup>slow</sup> +                   | 10 | 39 ± 13         | 61 ± 13 | 34 ± 5      | 335.08±0.07    | 0.167 |                             |         |             |                              |         |             |
| capu,khc <sup>slow</sup>                     | 8  | 34 ± 15         | 66 ± 15 | 39 ± 5      | 19.67±0.05     | 0.285 |                             |         |             |                              |         |             |
| <b>Tracking data from Parton et al. 2011</b> |    |                 |         |             |                |       |                             |         |             |                              |         |             |
| control                                      |    | 42              | 58      |             |                |       | 46                          | 54      |             | 37                           | 63      |             |
| par-1                                        |    | 49              | 51      |             |                |       |                             |         |             |                              |         |             |

|  |                         |
|--|-------------------------|
|  | similar to control      |
|  | stronger posterior bias |
|  | weaker posterior bias   |

Anterior-posterior orientation bias of microtubule growth in per cent ( $\pm$  95% confidence interval). *n* represents the number of cells analysed.  $\theta_{avg}$  gives the average angle of all EB1 orientations of all cells of a given genotype. *r* constitutes a measure of variance and lies between 0 and 1. The larger *r*, the less variable the data set.
